# Supplementary material for: Nutrient Intakes among Brazilian Children Need Improvement and Show Differences by Region and Socioeconomic Level
Source: MDPI journal article supplement (doi:10.3390/nu14030485), 2022-01-22
Supplement: s1 [file s1]

**Supplementary Table S1.** Instrument Modules used in the Brazil Kids Nutrition and Health Study.

| Module | Name                                                                                                         | Data Elements                                                                                                                                                    |                                                                                                               |
|--------|--------------------------------------------------------------------------------------------------------------|------------------------------------------------------------------------------------------------------------------------------------------------------------------|---------------------------------------------------------------------------------------------------------------|
| 1      | Household Screener                                                                                           | Eligibility criteria and child roster<br>Caregiver Consent                                                                                                       | Location information about the household                                                                      |
| 2      | Dietary Questions and 24-hr Dietary Recall (separate modules for 2 age groups and 1st and 2nd 24-hr recalls) | Child assent<br>Foods, beverages and dietary supplements consumed<br>Quantities of foods, beverages and dietary supplements<br>Location of foods consumed        | Eating occasions<br>Foods fed by other adults (if applicable)<br>Normalcy of diet prior day                   |
| 3      | Child Questionnaire                                                                                          | Socio-demographics of child and household<br>Feeding practices<br>Physical activity and free time activity levels<br>Sleep patterns<br>Screen time<br>Water type | Food allergies<br>Foods avoided<br>Childcare/school<br>Food security<br>Organic food choices<br>Special diets |
| 4      | Anthropometry                                                                                                | Weight, height, arm, waist and hip circumference                                                                                                                 |                                                                                                               |
| 5      | Record of Calls, Appointment Scheduling                                                                      | Status of each contact attempt at household                                                                                                                      | Appointment reminders to return to the household                                                              |

**Supplementary Table S2.** Food amount estimation kit inventory and guide for use in the Brazil Kids Nutrition and Health Study.

| Tool                                              | Guide for Use                                                                                                                                            |
|---------------------------------------------------|----------------------------------------------------------------------------------------------------------------------------------------------------------|
| <b>Food Amount Estimation Booklet<sup>1</sup></b> |                                                                                                                                                          |
| Grid for Squares and Rectangles                   | Non-loaf bread, cake                                                                                                                                     |
| Circles                                           | Biscuits, salty pancakes, meatballs                                                                                                                      |
| Wedges                                            | Pies, cake, pizza                                                                                                                                        |
| Height                                            | Cheese, non-loaf bread, cake                                                                                                                             |
| Butter on knives                                  | Butter, jam                                                                                                                                              |
| Mounds                                            | Rice, rice containing dishes, beans, bean containing dishes, mashed cassava, sweet potatoes, ice cream, pudding, pasta/noodles, and similar shaped foods |
| Fish                                              | Fish fillets                                                                                                                                             |
| Chicken                                           | Type of chicken piece and fraction consumed                                                                                                              |
| <b>Tableware<sup>1</sup></b>                      |                                                                                                                                                          |
| Copo de requeijao: cream cheese cup               | Cold beverages (e.g., water, milk, juice)                                                                                                                |
| Copo americano: American cup (small, large)       | Cold beverages (e.g., water, milk, juice)                                                                                                                |
| Xicara de cha: cup for tea                        | Hot beverages (e.g., tea, cocoa)                                                                                                                         |
| Xicara de cafe: cup for coffee                    | Hot beverages (e.g., tea, cocoa)                                                                                                                         |
| Colher de sopa: tablespoon                        | Condiments, sauces, sugar                                                                                                                                |
| Colher de sobremesa: dessert spoon                | Condiments, sauces, sugar                                                                                                                                |
| Colher de cha: teaspoon                           | Condiments, sauces, sugar                                                                                                                                |
| Colher de cafe: coffee spoon                      | Condiments, sauces, sugar                                                                                                                                |
| Bowls (2 sizes)                                   | Soups, cereals                                                                                                                                           |
| <b>Plastic food replicas</b>                      |                                                                                                                                                          |
| Roast beef                                        | Portion                                                                                                                                                  |
| Hamburger patties (2 sizes)                       | Small and large patty                                                                                                                                    |

<sup>1</sup> Food portions could be estimated using the visual tools in the Food Estimation booklet (e.g., grids, circles, wedges, etc.) which corresponded to amounts in the Nutrition Data System for Research. Similarly, the model tableware (e.g., cups, spoons and bowls) were of known volume and could be used to estimate portions consumed. Colored lines indicated different volumes if the full amount was not consumed.
